# Supplementary material for: Persistent Changes of Peripheral Blood Lymphocyte Subsets in Patients with Oral Squamous Cell Carcinoma
Source: MDPI journal article supplement (doi:10.3390/healthcare10020342), 2022-02-10
Supplement: s1 [file s1]

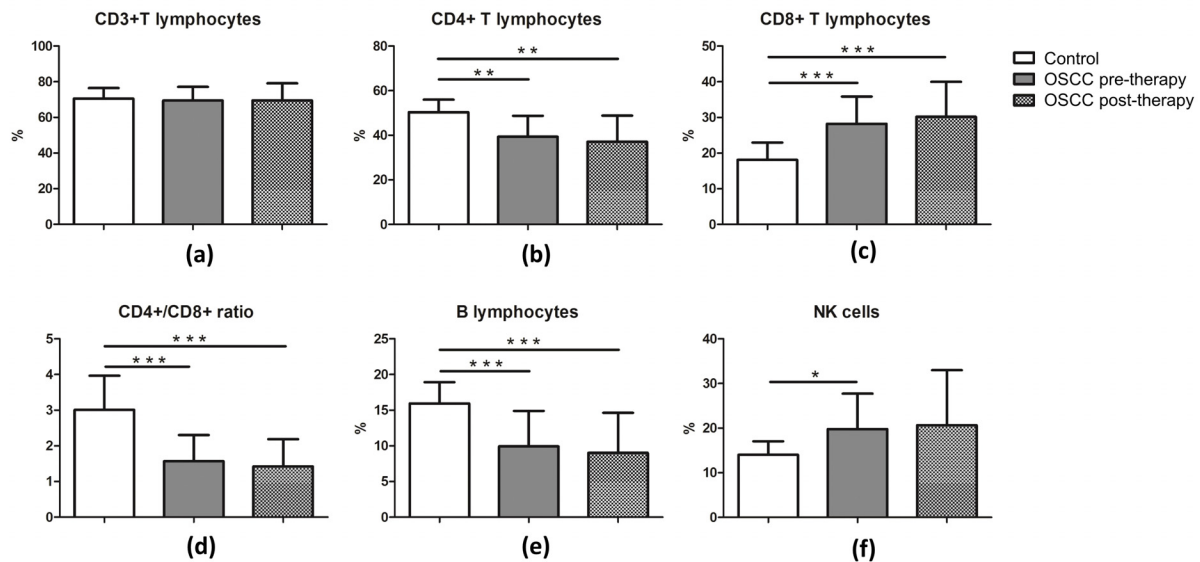

**Figure S1:** Circulating lymphocyte subtypes in pre- and post-therapeutic OSCC patients and the control group. (a) Proportion of circulating CD3+ T lymphocytes; (b) Percentage of circulating CD4+ T; (c) Proportion of circulating CD8+ T lymphocytes; (d) CD4+ / CD8+ ratio; (e) Proportion of circulating CD19+ B lymphocytes; (f) Proportion of circulating NK CD16+ cells. The error bars represent the standard deviation; \*  $p < 0.05$ , \*\*  $p < 0.01$  and \*\*\*  $p < 0.001$ . OSCC, oral squamous cell carcinoma; CD, cluster of differentiation; NK, natural killer.
